# Supplementary material
Source: HighWire-hosted journal article supplement (https://bmjopen.bmj.com/content/11/2/e042107)
Supplement: inline-supplementary-material-2 [file inline-supplementary-material-2.pdf]

**PRISMA-P (Preferred Reporting Items for Systematic review and Meta-Analysis Protocols) 2015 checklist: recommended items to address in a systematic review protocol\***

| Section and topic                 | Item No | Checklist item                                                                                                                                                                                  | PAGE WHERE IT IS REPORTED IN THIS PROTOCOL MANUSCRIPT |
|-----------------------------------|---------|-------------------------------------------------------------------------------------------------------------------------------------------------------------------------------------------------|-------------------------------------------------------|
| <b>ADMINISTRATIVE INFORMATION</b> |         |                                                                                                                                                                                                 |                                                       |
| Title:                            |         |                                                                                                                                                                                                 |                                                       |
| Identification                    | 1a      | Identify the report as a protocol of a systematic review                                                                                                                                        | PAGE 1                                                |
| Update                            | 1b      | If the protocol is for an update of a previous systematic review, identify as such                                                                                                              | NOT APPLICABLE                                        |
| Registration                      | 2       | If registered, provide the name of the registry (such as PROSPERO) and registration number                                                                                                      | PAGE 3                                                |
| Authors:                          |         |                                                                                                                                                                                                 |                                                       |
| Contact                           | 3a      | Provide name, institutional affiliation, e-mail address of all protocol authors; provide physical mailing address of corresponding author                                                       | PAGE 1                                                |
| Contributions                     | 3b      | Describe contributions of protocol authors and identify the guarantor of the review                                                                                                             | PAGE 19                                               |
| Amendments                        | 4       | If the protocol represents an amendment of a previously completed or published protocol, identify as such and list changes; otherwise, state plan for documenting important protocol amendments | PAGE 19                                               |
| Support:                          |         |                                                                                                                                                                                                 |                                                       |
| Sources                           | 5a      | Indicate sources of financial or other support for the review                                                                                                                                   | PAGE 19                                               |
| Sponsor                           | 5b      | Provide name for the review funder and/or sponsor                                                                                                                                               | PAGE 19                                               |
| Role of sponsor or funder         | 5c      | Describe roles of funder(s), sponsor(s), and/or institution(s), if any, in developing the protocol                                                                                              | PAGE 19                                               |
| <b>INTRODUCTION</b>               |         |                                                                                                                                                                                                 |                                                       |
| Rationale                         | 6       | Describe the rationale for the review in the context of what is already known                                                                                                                   | PAGE 4 TO 8                                           |
| Objectives                        | 7       | Provide an explicit statement of the question(s) the review will address with reference to participants, interventions, comparators, and outcomes (PICO)                                        | PAGE 8 TO 9                                           |
| <b>METHODS</b>                    |         |                                                                                                                                                                                                 |                                                       |
| Eligibility criteria              | 8       | Specify the study characteristics (such as PICO, study design, setting,                                                                                                                         | PAGE 9 TO 10                                          |

|                                    |     |                                                                                                                                                                                                                                                  |                                |
|------------------------------------|-----|--------------------------------------------------------------------------------------------------------------------------------------------------------------------------------------------------------------------------------------------------|--------------------------------|
|                                    |     | time frame) and report characteristics (such as years considered, language, publication status) to be used as criteria for eligibility for the review                                                                                            |                                |
| Information sources                | 9   | Describe all intended information sources (such as electronic databases, contact with study authors, trial registers or other grey literature sources) with planned dates of coverage                                                            | PAGE 11                        |
| Search strategy                    | 10  | Present draft of search strategy to be used for at least one electronic database, including planned limits, such that it could be repeated                                                                                                       | Appendix/Supplemental material |
| Study records:                     |     |                                                                                                                                                                                                                                                  |                                |
| Data management                    | 11a | Describe the mechanism(s) that will be used to manage records and data throughout the review                                                                                                                                                     | PAGE 12                        |
| Selection process                  | 11b | State the process that will be used for selecting studies (such as two independent reviewers) through each phase of the review (that is, screening, eligibility and inclusion in meta-analysis)                                                  | PAGE 12                        |
| Data collection process            | 11c | Describe planned method of extracting data from reports (such as piloting forms, done independently, in duplicate), any processes for obtaining and confirming data from investigators                                                           | PAGE 13                        |
| Data items                         | 12  | List and define all variables for which data will be sought (such as PICO items, funding sources), any pre-planned data assumptions and simplifications                                                                                          | PAGE 13                        |
| Outcomes and prioritization        | 13  | List and define all outcomes for which data will be sought, including prioritization of main and additional outcomes, with rationale                                                                                                             | PAGE 13                        |
| Risk of bias in individual studies | 14  | Describe anticipated methods for assessing risk of bias of individual studies, including whether this will be done at the outcome or study level, or both; state how this information will be used in data synthesis                             | PAGE 13 TO 14                  |
| Data synthesis                     | 15a | Describe criteria under which study data will be quantitatively synthesised                                                                                                                                                                      | PAGE 14 TO 17                  |
|                                    | 15b | If data are appropriate for quantitative synthesis, describe planned summary measures, methods of handling data and methods of combining data from studies, including any planned exploration of consistency (such as $I^2$ , Kendall's $\tau$ ) | PAGE 14 TO 17                  |
|                                    | 15c | Describe any proposed additional analyses (such as sensitivity or subgroup analyses, meta-regression)                                                                                                                                            | PAGE 14 TO 17                  |
|                                    | 15d | If quantitative synthesis is not appropriate, describe the type of summary planned                                                                                                                                                               | PAGE 14 TO 17                  |
| Meta-bias(es)                      | 16  | Specify any planned assessment of meta-bias(es) (such as publication                                                                                                                                                                             | PAGE 17                        |

---

|                                   |    |                                                                                    |         |
|-----------------------------------|----|------------------------------------------------------------------------------------|---------|
|                                   |    | bias across studies, selective reporting within studies)                           |         |
| Confidence in cumulative evidence | 17 | Describe how the strength of the body of evidence will be assessed (such as GRADE) | PAGE 18 |

---

**\* It is strongly recommended that this checklist be read in conjunction with the PRISMA-P Explanation and Elaboration (cite when available) for important clarification on the items. Amendments to a review protocol should be tracked and dated. The copyright for PRISMA-P (including checklist) is held by the PRISMA-P Group and is distributed under a Creative Commons Attribution Licence 4.0.**

*From: Shamseer L, Moher D, Clarke M, Ghersi D, Liberati A, Petticrew M, Shekelle P, Stewart L, PRISMA-P Group. Preferred reporting items for systematic review and meta-analysis protocols (PRISMA-P) 2015: elaboration and explanation. BMJ. 2015 Jan 2;349(jan02 1):g7647.*
